# Supplementary material for: Quassinoid analogs with enhanced efficacy for treatment of hematologic malignancies target the PI3Kγ isoform
Source: PubMed Central journal article supplement (PMC7253423; doi:10.1038/s42003-020-0996-z), 2020-05-27
Supplement: 42003_2020_996_MOESM2_ESM.pdf [file 42003_2020_996_MOESM2_ESM.pdf]

**Supplementary Method.** Generation of the tested compounds in this study.

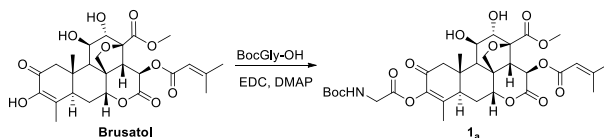

**1a (#15, 51-60-re-A). (1R,2S,3S,3aS,3a1R,4R,6aR,7aR,11aS)-methyl 9-(2-((tert-butoxycarbonyl)amino)acetoxy)-1,2-dihydroxy-8,11a-dimethyl-4-((3-methylbut-2-enoyl)oxy)-5,10-dioxo-2,3,3a,4,5,6a,7,7a,10,11,11a,11b-dodecahydro-1H-3,3a1-(epoxymethano) dibenzo[de,g]chromene-3-carboxylate**

Boc-glycine (25 mg, 0.144 mmol), EDC·HCl (37 mg, 0.192 mmol), and 4-DMAP (12 mg, 0.0962 mmol) was added to brusatol (50 mg, 0.0962 mmol) in 2 mL THF. The reaction was stirred overnight. After diluting with EtOAc, the reaction mixture was washed with saturated aqueous NH<sub>4</sub>Cl twice and then with brine once. The organic phase was concentrated and purified with HPLC with acetonitrile (0.1% TFA) in water (0.1% TFA) at a gradient of 34-69% in 10 min, to give a white solid (36.4 mg, 55.9%). <sup>1</sup>H NMR (300 MHz, CDCl<sub>3</sub>): δ 5.59 (s, 1H), 4.78 (broad s, 1H), 4.69 (d, *J* = 7.5 Hz, 1H), 4.18-4.10 (m, 2H), 4.10-4.04 (m, 2H), 3.75-3.68 (m, 4H), 3.36-3.32 (m, 1H), 3.20-3.08 (m, 1H), 3.06-2.96 (m, 1H), 2.94-2.64 (m, 2H), 2.43-2.28 (m, 2H), 2.13 (s, 3H), 2.08-2.02 (m, 1H), 1.88 (s, 3H), 1.85-1.72 (m, 1H), 1.77 (s, 3H), 1.42 (s, 3H), 1.40 (s, 9H); Calculated for C<sub>33</sub>H<sub>43</sub>NO<sub>14</sub>, 677.69; observed (M+H)<sup>+</sup> 678.8.

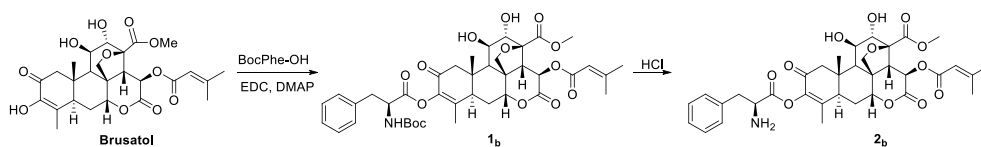

**2<sub>b</sub> (#14, 51-60-C). (1R,2S,3S,3aS,3a1R,4R,6aR,7aR,11aS)-methyl 9-(((S)-2-amino-3-phenylpropanoyl)oxy)-1,2-dihydroxy-8,11a-dimethyl-4-((3-methylbut-2-enoyl)oxy)-5,10-dioxo-2,3,3a,4,5,6a,7,7a,10,11,11a,11b-dodecahydro-1H-3,3a1-(epoxymethano)dibenzo[de,g]chromene-3-carboxylate.**

According to the procedure for preparation of compound **1<sub>a</sub>**, brusatol (20 mg, 0.0385 mmol) was treated with Boc-L-phenylalanine (15 mg, 0.0577 mmol), EDC·HCl (15 mg, 0.769 mmol), and 4-DMAP (4.7 mg, 0.0385 mmol) afford **1<sub>b</sub>** [HPLC purification with a gradient of 41-76% of acetonitrile (0.1% TFA) in water (0.1% TFA) in 10 min], which was converted to **2<sub>b</sub>** as a clear oil. upon acidic deprotection. <sup>1</sup>H NMR (300 MHz, CDCl<sub>3</sub>): δ 7.34-7.26 (m, 5H), 5.576 (s, 1 H), 4.774 (s, 1 H), 4.656 (d, *J* = 7.5 Hz, 1 H), 4.48-4.32 (m, 1H), 4.44-4.34 (m, 1H), 4.16-4.06 (m, 2H), 3.70 (s, 3H), 3.62-3.52 (m, 2H), 3.32-3.26 (m, 2H), 3.22-2.95 (m, 1H), 2.95-2.84 (m, 2H), 2.43-2.25 (m, 2H), 2.11 (s, 3H), 2.07-2.00 (m, 1H), 1.86 (s, 3H), 1.75-1.63 (m, 3H), 1.62-1.56 (m, 1H), 1.42-1.16 (m, 3H); Calculated for C<sub>35</sub>H<sub>41</sub>NO<sub>12</sub>, 667.70; observed (M+H)<sup>+</sup> 668.8.

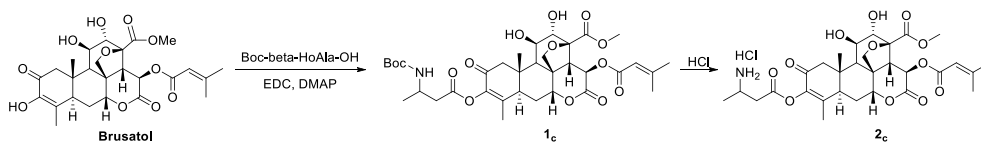

**2<sub>c</sub> (#26, 51-62-NB-B2, 51-69). (1R,2S,3S,3aS,3a1R,4R,6aR,7aR,11aS)-methyl 9-((3-aminobutanoyl)oxy)-1,2-dihydroxy-8,11a-dimethyl-4-((3-methylbut-2-enoyl)oxy)-5,10-dioxo-2,3,3a,4,5,6a,7,7a,10,11,11a,11b-dodecahydro-1H-3,3a1-(epoxymethano)dibenzo[de,g]chromene-3-carboxylate.**

According to the procedure for preparation of compound **1<sub>a</sub>**, brusatol (50 mg, 0.0962 mmol) was treated with Boc-β-HoAla-OH (29 mg, 0.144 mmol), EDC·HCl (37

mg, 0.192 mmol), and 4-DMAP (12 mg, 0.0962 mmol) afford **1c** [HPLC purification with a gradient of 34-69% of acetonitrile (0.1% TFA) in water (0.1% TFA) in 10 min], which was converted to **2c** upon acidic deprotection. There were two isomers in the mixture, which was purified by HPLC with a gradient of 20-55% in 10 min. The 2<sup>nd</sup> fraction was the main product, as a white solid (20.1 mg, 29.0% in two steps). <sup>1</sup>H NMR (300 MHz, CDCl<sub>3</sub>): δ 5.59 (s, 1H), 4.79 (s, 1H), 4.68 (d, *J* = 8.1 Hz, 1H), 4.18-4.10 (m, 2H), 3.76-3.62 (m, 4H), 3.36-3.30 (m, 2H), 3.21-3.11 (m, 1H), 3.09-3.00 (m, 1H), 2.95-2.78 (m, 5H), 2.46-2.28 (m, 2H), 2.13 (s, 3H), 2.10-2.02 (m, 1H), 1.88 (s, 3H), 1.86-1.80 (m, 1H), 1.78 (s, 3H), 1.41 (s, 3H), 1.39 (s, 3H); Calculated for C<sub>30</sub>H<sub>39</sub>NO<sub>12</sub>, 605.63; observed (M+H)<sup>+</sup> 606.8.

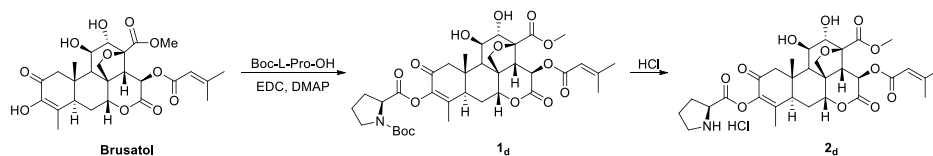

**2a (#31, 51-64-NB, 51-80). (2S)-(1R,2S,3S,3aS,3a1R,4R,6aR,7aR,11aS)-1,2-dihydroxy-3-(methoxycarbonyl)-8,11a-dimethyl-4-((3-methylbut-2-enoyl)oxy)-5,10-dioxo-2,3,3a,4,5,6a,7,7a,10,11,11a,11b-dodecahydro-1H-3,3a1-(epoxymethano)dibenzo[de,g]chromen-9-yl pyrrolidine-2-carboxylate.**

According to the procedure for preparation of compound **1a**, brusatol (20 mg, 0.0385 mmol) was treated with Boc-Pro-OH (12 mg, 0.0577 mmol), EDCI·HCl (15 mg, 0.769 mmol), and 4-DMAP (4.7 mg, 0.0385 mmol) afford **1a** [HPLC purification with a gradient of 35-70% of acetonitrile (0.1% TFA) in water (0.1% TFA) in 10 min], which was converted to **2a** as a clear oil (10.7 mg, 38.2%) upon acidic deprotection. <sup>1</sup>H NMR (300 MHz, CDCl<sub>3</sub>): δ 5.59 (s, 1H), 4.79 (broad s, 1H), 4.71-4.64 (m, 2H), 4.17-4.09 (m, 2H), 3.75-3.65 (m, 5H), 3.64-3.54 (m, 2H), 3.36-3.30 (m, 2H), 3.20-3.70 (m, 2), 2.58-2.44

(m, 2H), 2.44-2.28 (m, 2H), 2.13 (s, 3H), 2.18-2.02 (m, 3H), 2.00-1.92 (m, 2H), 1.88 (s, 3H), 1.84-1.74 (m, 2H), 1.64-1.40 (m, 3H); Calculated for C<sub>31</sub>H<sub>39</sub>NO<sub>12</sub>, 617.64; observed (M+H)<sup>+</sup> 618.8.

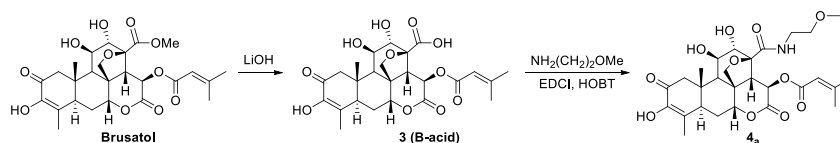

**4a (5, 51-57-C). (1R,2S,3S,3aS,3a1R,4R,6aR,7aR,11aS)-1,2,9-trihydroxy-3-((2-methoxyethyl)carbamoyl)-8,11a-dimethyl-5,10-dioxo-**

**2,3,3a,4,5,6a,7,7a,10,11,11a,11b-dodecahydro-1H-3,3a1-**

**(epoxymethano)dibenzo[de,g]chromen-4-yl 3-methylbut-2-enoate**

**3 (B-acid) (1R,2S,3S,3aS,3a1R,4R,6aR,7aR,11aS)-1,2,9-trihydroxy-8,11a-dimethyl-**

**4-((3-methylbut-2-enoyl)oxy)-5,10-dioxo-2,3,3a,4,5,6a,7,7a,10,11,11a,11b-**

**dodecahydro-1H-3,3a1-(epoxymethano) dibenzo[de,g] chromene-3-carboxylic acid**

**(B-acid).**

LiOH<sub>(aq)</sub> (1 M, 1.1 eq) was added to brusatol in THF, and the reaction was stirred overnight. The resulting intermediate was purified by HPLC with acetonitrile (0.1% TFA) in water (0.1% TFA). <sup>1</sup>H NMR (CDCl<sub>3</sub>-MeOD): 6.33 (broad s, 1H, H15), 5.68 (s, 1H, H2'), 4.80 (s, 1H, H7), 4.74 (d, *J* = 7.6 Hz, 1H, H20b), 4.22 (s, 1H, H12), 4.13 (s, 1H, H11), 3.80 (d, *J* = 7.3 Hz, 1H, H14), 3.09 (d, *J* = 10.3 Hz, 1H, H20a), 2.98 (s, 1H, H1b), 2.93 (s, 1H, H5), 2.50-2.30 (m, 2H, H9 & H1b), 2.18 (s, 3H), 2.21-2.10 (m, 1H, H6a), 1.91 (s, 3H), 1.85 (s, 3H), 1.84-1.68 (m, 1H, H6b), 1.39 (s, 3H); Calculated for C<sub>25</sub>H<sub>30</sub>O<sub>11</sub>, 506.2; observed 507.6.

To the **3 (B-acid)** (10 mg, 0.020 mmol) with excess triethylamine in 2 mL DCM, was added EDC·HCl (19 mg, 0.099 mmol), HOBT·H<sub>2</sub>O (13 mg, 0.099 mmol), and 2-methoxyethanamine (9 μL, 0.099 mmol). The reaction was stirred at room temperature overnight. Then it was partitioned between EtOAc and saturated aqueous NH<sub>4</sub>Cl. The organic phase was concentrated and purified by HPLC, resulting in the product as a white solid. <sup>1</sup>H NMR (300 MHz, CDCl<sub>3</sub>): δ 5.59 (s, 1H), 4.78-4.68 (m, 2H), 4.14-4.09 (m, 1H), 3.91 (s, 1H), 3.71 (d, *J* = 7.5 Hz, 1H), 3.42-3.36 (m, 2H), 3.36-3.31 (m, 3H), 3.31-3.28 (m, 2H), 2.72-2.61 (m, 2H), 2.39-2.25 (m, 2H), 2.12 (s, 3H), 2.10-2.07 (m, 1H), 1.86 (s, 3H), 1.81-1.76 (m, 3H), 1.75-1.63 (m, 1H), 1.32 (s, 3H) ); Calculated for C<sub>28</sub>H<sub>37</sub>NO<sub>11</sub>, 563.59; observed (M+H)<sup>+</sup> 564.7.

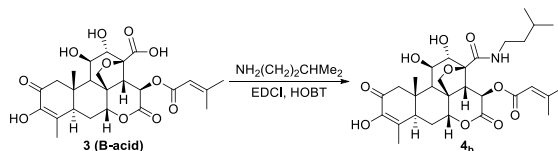

**4<sub>b</sub> (6, 51-57-D). (1R,2S,3S,3aS,3a1R,4R,6aR,7aR,11aS)-1,2,9-trihydroxy-3-(isopentylcarbamoyl)-8,11a-dimethyl-5,10-dioxo-2,3,3a,4,5,6a,7,7a,10,11,11a,11b-dodecahydro-1H-3,3a1-(epoxymethano)dibenzo[de,g]chromen-4-yl 3-methylbut-2-enoate.**

According to the procedure for preparation of compound **4<sub>a</sub>**, **3** (10 mg, 0.020 mmol) was treated with EDC·HCl (19 mg, 0.099 mmol), HOBT·H<sub>2</sub>O (13 mg, 0.099 mmol), and isoamylamine (11 μL, 0.099 mmol) to afford **4<sub>b</sub>** as a white solid. <sup>1</sup>H NMR (300 MHz, CDCl<sub>3</sub>): δ 5.64 (s, 1H), 4.79 (d, *J* = 7.5 Hz, 1H), 4.73 (broad s, 1H), 4.19-4.15 (m, 1H), 3.93 (broad s, 1H), 3.71 (d, *J* = 7.5 Hz, 1H), 3.46-3.36 (m, 1H), 3.36-3.22 (m, 1H), 3.18-3.04 (m, 1H), 2.98-2.86 (m, 2H), 2.42-2.28 (m, 2H), 2.25-2.10 (m, 3H), 1.91-

1.86 (m, 4H), 1.75-1.65 (m, 3H), 1.64-1.50 (m, 2H), 1.41-1.36 (m, 2H), 1.35 (s, 3H), 0.92-0.85 (m, 7H); Calculated for C<sub>30</sub>H<sub>41</sub>NO<sub>10</sub>, 575.65; observed (M+H)<sup>+</sup> 576.8.

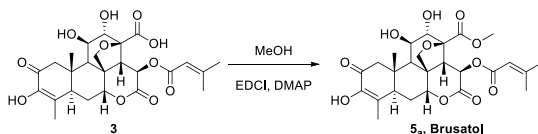

### Brusatol (34, 51-70-A)

To **3** (15 mg, 0.030 mmol) in 2 mL MeOH, EDC·HCl (11 mg, 0.059 mmol) and 4-DMAP (4 mg, 0.030 mmol) was added. The reaction was stirred at room temperature overnight. Then it was partitioned between EtOAc and saturated aqueous NH<sub>4</sub>Cl. The organic phase was concentrated down and purified by HPLC, resulting in the product as a white solid (4.9 mg, 32%). <sup>1</sup>H NMR (300 MHz, CD<sub>3</sub>OD): δ 5.67 (s, 1H), 4.83 (broad s, 1H), 4.70 (d, *J* = 7.6 Hz, 1H), 4.22-4.14 (m, 2H), 3.74-3.68 (m, 4H), 3.40-3.20 (m, 2H), 3.01-2.92 (m, 1H), 2.88-2.79 (m, 1H), 2.57-2.48 (m, 1H), 2.35-2.25 (m, 1H), 2.23-2.19 (m, 1H), 2.17 (s, 3H), 1.94 (s, 3H), 1.89-1.85 (m, 1H), 1.84 (s, 3H), 1.37 (s, 3H); Calculated for C<sub>25</sub>H<sub>30</sub>O<sub>11</sub>, 520.53; observed (M+H)<sup>+</sup> 521.7.

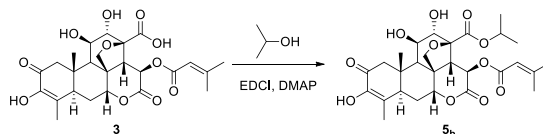

**5<sub>b</sub>** (35, 51-70-C). (1R,2S,3S,3aS,3a1R,4R,6aR,7aR,11aS)-isopropyl 1,2,9-trihydroxy-8,11a-dimethyl-4-((3-methylbut-2-enoyl)oxy)-5,10-dioxo-2,3,3a,4,5,6a,7,7a,10,11,11a,11b-dodecahydro-1H-3,3a1-(epoxymethano)dibenzo[de,g]chromene-3-carboxylate.

According to the procedure for preparation of compound **5a**, **3** (15 mg, 0.030 mmol) was treated with EDC·HCl (11 mg, 0.059 mmol) and 4-DMAP (4 mg, 0.030 mmol), and isopropanol (2 mL) to afford **5b** as a white solid (3.5 mg, 21%). <sup>1</sup>H NMR (300 MHz, CD<sub>3</sub>OD): δ 5.67 (s, 1H), 4.83-4.79 (m, 1H), 4.69 (d, *J* = 7.6 Hz, 1H), 4.21-4.14 (m, 2H), 3.75-3.66 (m, 1H), 3.40-2.20 (m, 3H), 3.02-2.92 (m, 1H), 2.88-2.80 (m, 1H), 2.58-2.48 (m, 1H), 2.35-2.25 (m, 1H), 2.25-2.19 (m, 1H), 2.16 (s, 3H), 2.00-1.89 (m, 4H), 1.89-1.80 (m, 3H), 1.37 (s, 3H), 1.33-1.22 (m, 6H); Calculated for C<sub>28</sub>H<sub>36</sub>O<sub>11</sub>, 548.58; observed (M+H)<sup>+</sup> 549.7.

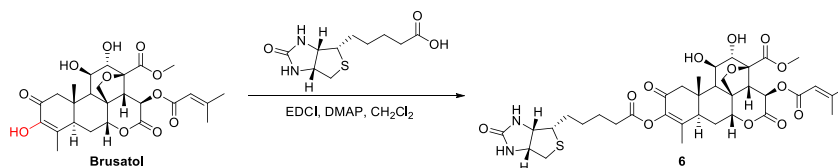

**6 (51048). (1R,2S,3S,3aS,3a1R,4R,6aR,7aR,11aS)-methyl 1,2-dihydroxy-8,11a-dimethyl-4-((3-methylbut-2-enoyl)oxy)-5,10-dioxo-9-((5-((3aS,4S,6aR)-2-oxohexahydro-1H-thieno[3,4-d]imidazol-4-yl)pentanoyl)oxy)-2,3,3a,4,5,6a,7,7a,10,11,11a,11b-dodecahydro-1H-3,3a1-(epoxymethano)dibenzo[de,g]chromene-3-carboxylate.**

To brusatol (20 mg, 0.0385 mmol) in 2 mL DCM, EDC·HCl (15 mg, 0.769 mmol), 4-DMAP (4.7 mg, 0.0385 mmol), and D-biotin (9 mg, 0.0385 mmol) was added. The reaction was stirred at room temperature for 2 days. Then it was diluted with EtOAc and washed with saturated aqueous NH<sub>4</sub>Cl and brine. The organic phase was concentrated down and then purified by HPLC with acetonitrile (0.1% TFA) in water (0.1% TFA) at a gradient of 20-60% in 12 min, resulting in the product as a white solid (13.7 mg, 47.7%). <sup>1</sup>H NMR (CDCl<sub>3</sub>-MeOD): (ppm) 5.62 (s, 1H, 2'), 4.78 (s, 1H, 15),

4.75-4.60 (m, 1H, H7), 4.55-4.35 (m, 2H, NHCH & H20b), 4.34-4.03 (m, 2H, NHCH & H12), 3.79 (s, 3H, OMe), 3.85-3.70 (m, 1H, H14), 3.30-3.00 (m, 3H, H20a & SCH & H11), 3.00-2.75 (m, 2H, SCHa & SCHb), 2.70-2.55 (m, 1H, H1a), 2.45-2.00 (m, 5H, H5, COCH2 & CH3 & H1b), 1.98-1.30 (m, 18H, 3xCH2 & H6x2 & H9 & 3xCH3);  
 Calculated for C<sub>36</sub>H<sub>46</sub>N<sub>2</sub>O<sub>13</sub>S, 746.3; observed 747.4.

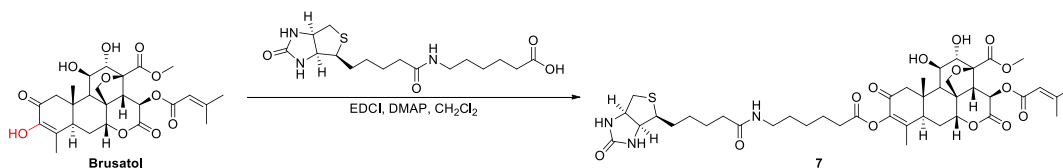

**7 (51052). (1R,2S,3S,3aS,3a1R,4R,6aR,7aR,11aS)-methyl 1,2-dihydroxy-8,11a-dimethyl-4-((3-methylbut-2-enoyl)oxy)-5,10-dioxo-9-((6-(5-((3aS,4R,6aR)-2-oxohexahydro-1H-thieno[3,4-d]imidazol-4-yl)pentanamido)hexanoyl)oxy)-2,3,3a,4,5,6a,7,7a,10,11,11a,11b-dodecahydro-1H-3,3a1-(epoxymethano)dibenzo[de,g]chromene-3-carboxylate.**

Brusatol (10.2 mg, 0.02 mmol), N-(+)-Biotinyl-6-aminohexanoic acid (7.0 mg, 0.02 mmol), EDCI (7.7 mg, 0.04 mmol), DMAP (2.4 mg, 0.04 mmol) were dissolved in CH<sub>2</sub>Cl<sub>2</sub> (1 ml). The mixture was stirred under argon at room temperature for a week. Solvent was removed in vacuo, and the residue was partitioned between ethyl acetate and brine. The organic phase was concentrated. The desired conjugate (1.7 mg) was obtained as a white solid after HPLC separation (gradient: 20-53% of acetonitrile : water in 15 minutes) and lyophilization. <sup>1</sup>H NMR (CDCl<sub>3</sub>-MeOD): (ppm) 5.69-5.63 (m, 1H, 2'), 4.86-4.81 (m, 1H, 7), 4.80-4.72 (m, 1H, H12), 4.58-4.48 (m, 1H, NH) 4.34-4.27 (m, 2H, NH & H11), 4.27-4.22 (m, 1H, H20b), 3.78 (s, 3H, OMe), 3.82-3.72 (m, 1H, H14), 3.30-3.10 (m, 4H, H20a & NCH2 & SCH), 3.03-2.75 (m, 3H, H5 & 1a & SCHa), 2.65-2.35



(m, 2H, SCHb & 1b), 2.25-2.15 (m, 7H, 2xCOCH<sub>2</sub> & CH<sub>3</sub>), 1.90 (s, 3H), 1.90-1.30 (m, 21H, 6xCH<sub>2</sub> & H<sub>6x2</sub> & H<sub>9</sub> & 2xCH<sub>3</sub>); Calculated for C<sub>42</sub>H<sub>57</sub>N<sub>3</sub>O<sub>14</sub>S, 859.4; observed 861.0.

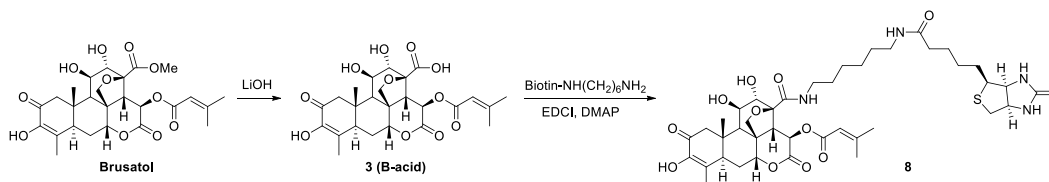

**8 (51046). (1R,2S,3S,3aS,3a1R,4R,6aR,7aR,11aS)-1,2,9-trihydroxy-8,11a-dimethyl-5,10-dioxo-3-((6-(5-((3aS,4R,6aR)-2-oxohexahydro-1H-thieno[3,4-d]imidazol-4-yl)pentanamido)hexyl)carbamoyl)-2,3,3a,4,5,6a,7,7a,10,11,11a,11b-dodecahydro-1H-3,3a1-(epoxymethano)dibenzo[de,g]chromen-4-yl 3-methylbut-2-enoate.**

To **3** (12 mg, 0.024 mmol) and excess triethylamine in 2 mL DCM, EDC·HCl (23 mg, 0.12 mmol), HOBT·H<sub>2</sub>O (16 mg, 0.12 mmol), and N-(6-aminohexyl)-biotinamide (41 mg, 0.12 mmol) was added. The reaction was stirred at room temperature for 2 days. Then it was partitioned between EtOAc and saturated aqueous NH<sub>4</sub>Cl. The organic phase was concentrated and then purified by HPLC at a gradient of 20-70% in 20 min to provide a white solid (3.7 mg, %) after lyophilization. <sup>1</sup>H NMR (CDCl<sub>3</sub>-MeOD): 7.50-7.38 (m, 1H), 5.64 (s, 1H, H<sub>2'</sub>), 4.90-4.75 (m, 2H, H<sub>20b</sub> & H<sub>15</sub>), 4.55-4.45 (m, 1H, NHCH), 4.38-4.25 (m, 1H, NHCH), 4.23-4.15 (m, 1H, H<sub>7</sub>), 3.96 (s, 1H, H<sub>12</sub>), 3.85-3.75 (m, 1H, H<sub>11</sub>), 3.60-3.30 (m, 1H, H<sub>20a</sub>), 3.30-3.10 (m, 6H, 2xNHCH<sub>2</sub> & SCH & H<sub>14</sub>), 3.00-2.85 (m, 3H, SCH<sub>2</sub> & H<sub>5</sub>), 2.83-2.68 (m, 1H, H<sub>1a</sub>), 2.50-2.30 (m, 2H, H<sub>9</sub> and H<sub>1b</sub>), 2.24-2.10 (m, 6H, CH<sub>3</sub> & COCH<sub>2</sub> & H<sub>6a</sub>), 1.93 (s, 3H), 1.85 (s, 3H), 1.85-1.20 (m, 18H, 7xCH<sub>2</sub> & CH<sub>3</sub> & H<sub>6b</sub>).

## Supplementary Figures

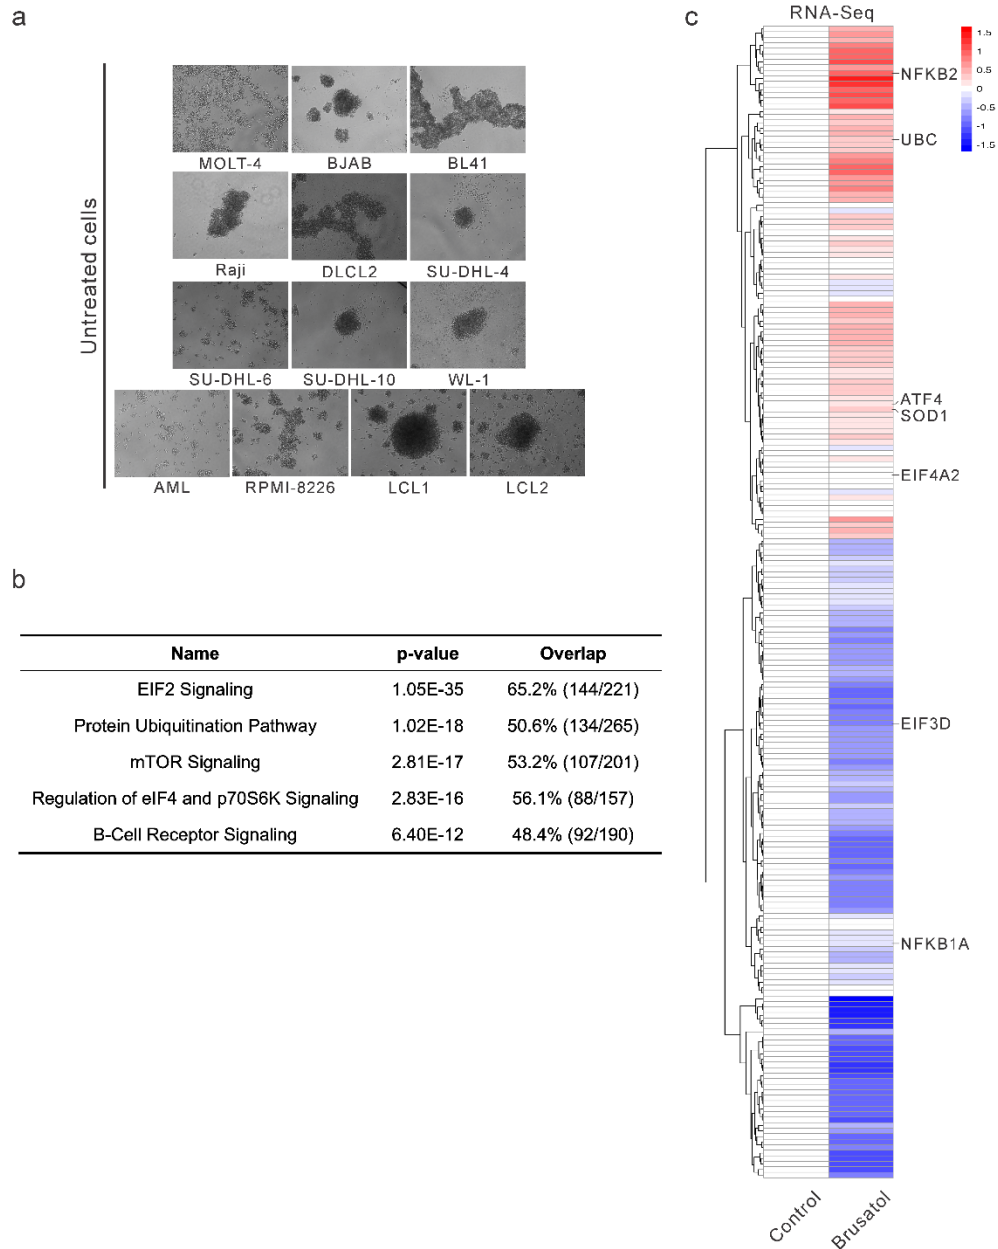

**Supplementary Fig. 1. RNA-Seq analysis of Brusatol-treated cells.** (a) Microscopic pictures show the normal status of tested cells. (b) P-value and overlap percent of Brusatol-related signaling pathways were demonstrated from RNA-Seq analysis. (c) Heatmap summarized the up-regulated and down-regulated genes in Brusatol-treated LCL1 cells.

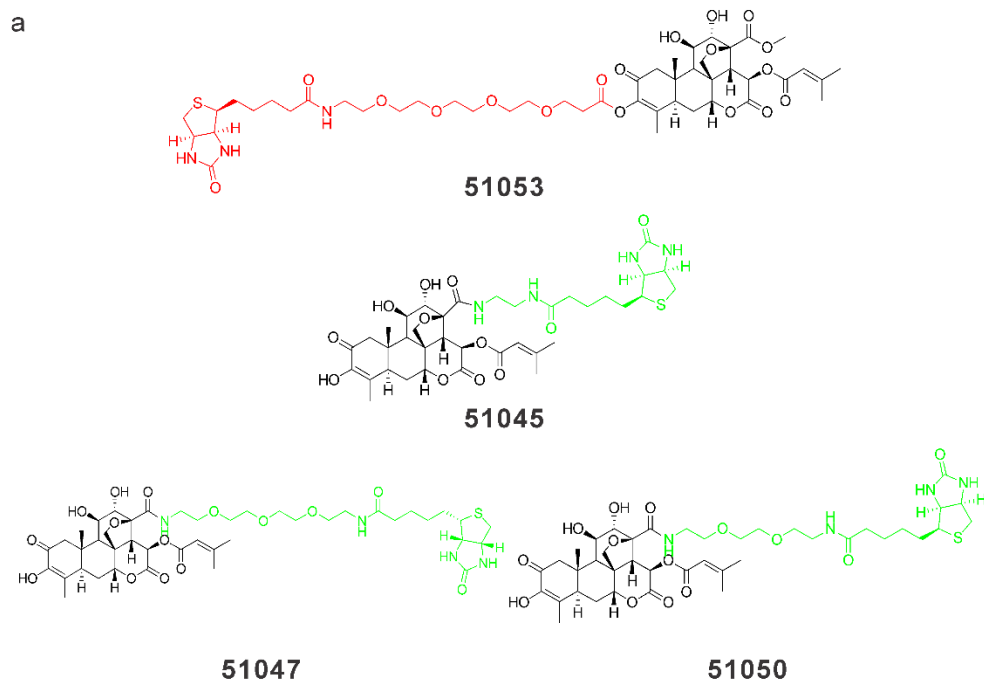

b

| IC <sub>50</sub> ( $\mu$ M) | Modified at C-3 Position |       |       | Modified at C-21 Position |       |       |       |
|-----------------------------|--------------------------|-------|-------|---------------------------|-------|-------|-------|
|                             | 51048                    | 51052 | 51053 | 51045                     | 51046 | 51047 | 51050 |
| PDX-129                     | 1.726                    | 0.076 | 0.656 | >10                       | 1.637 | >10   | >10   |
| PDX-223                     | 3.565                    | 0.108 | 1.056 | >10                       | 8.974 | >10   | >10   |
| PDX-255                     | 0.789                    | 0.025 | 0.249 | >10                       | 0.494 | >10   | >10   |
| Toledo                      | >10                      | 0.388 | >10   | >10                       | 8.913 | >10   | >10   |
| Pfeiffer                    | 3.170                    | 0.079 | 0.414 | >10                       | 3.013 | >10   | >10   |
| JeKo-1                      | 1.186                    | 0.028 | 0.132 | >10                       | 1.393 | >10   | >10   |

**Supplementary Fig. 2. Biotin-conjugated Brusatol compounds exhibit inhibitory effects.** (a) Chemical structures of synthesized biotin-conjugated compounds were shown. (b) IC<sub>50</sub> assays of biotin-conjugated compounds were performed in multiple PDXs and lymphoma cells.

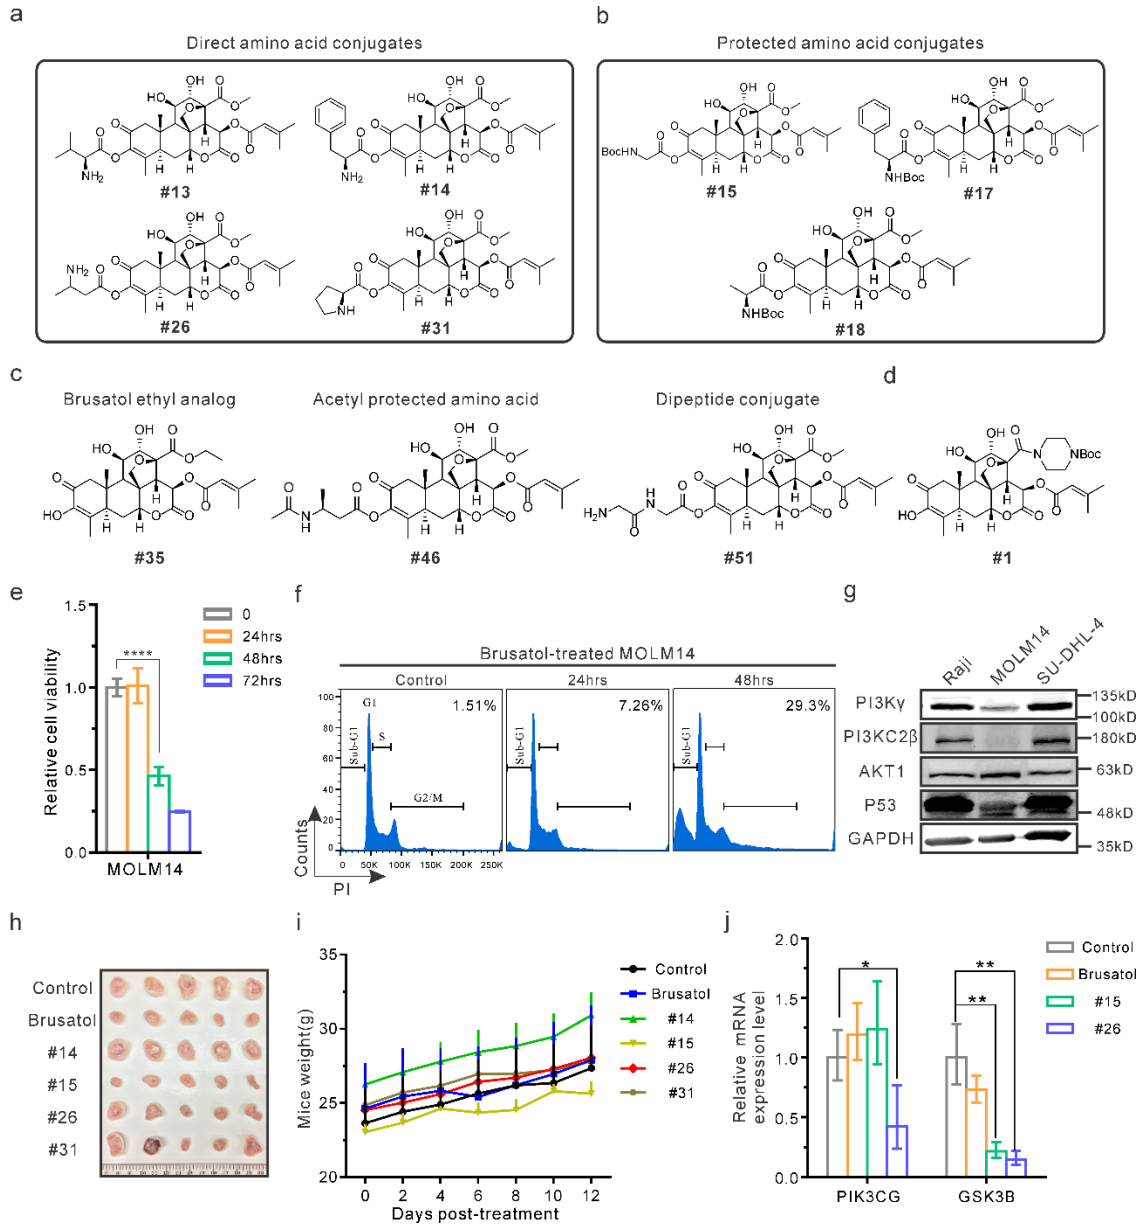

**Supplementary Fig. 3. Developed Brusatol analogs show inhibitory effects *in vitro* and *in vivo*.** (a-c) Chemical structures of representative Brusatol analogs with different modifications were shown. (d) The compound #1 was shown as an inactivated drug. (e) MOLM14 cells were treated with 100 nM Brusatol for different times (0, 24 hours, 48 hours, 72 hours) and cell viability was examined by detecting luminescence activity. Results are the mean  $\pm$  standard error of the duplicates. \*\*\*\*p < 0.0001 shows the significant differences between the indicated groups. (f) MOLM14 cells were treated with 100 nM Brusatol for indicated times (0, 24 hours, 48 hours) and cell cycle assay was determined with flow cytometry. The subG1 population in cells was labeled as the percentage. (g) The expressions of PI3K associated proteins were detected in Raji, MOLM14, and SU-DHL-4 cells with western blot. (h) The microscopic examination of these tumors from the dissected mice was shown. (i) Mice weight was monitored after

Brusatol or its analogs treatment *in vivo*. (j) Total RNAs were extracted from the xenografts, and Real-time PCR analysis was performed to detect PIK3CG and GSK3B expression. Results are the mean  $\pm$  standard error of the samples (n=3). \*p < 0.05 and \*\*p < 0.01 show the significant differences as compared to the control group.

**Supplementary Table.** Cell lines, antibodies, primers, and compounds used in this study.

| Cells     | Organism | Cell type/Disease                                                          | Source/Code       |
|-----------|----------|----------------------------------------------------------------------------|-------------------|
| AML       | human    | Monocyte, acute myeloid leukemia                                           | Dr. Mariusz Wasik |
| BJAB      | human    | B lymphocyte, Burkitt's lymphoma                                           | Lab               |
| BL41      | human    | Burkitt's lymphoma                                                         | Lab               |
| DLCL2     | human    | Diffuse large B-cell lymphoma germinal center B-cell type, B-cell lymphoma | Dr. Ari Melnick   |
| HepG2     | human    | Hepatocellular carcinoma                                                   | Lab               |
| HL-60     | human    | Promyeloblast, acute promyelocytic leukemia                                | Dr. Jianxin You   |
| H929      | human    | B lymphocyte, plasmacytoma, myeloma                                        | ATCC (CRL-9068)   |
| K562      | human    | Chronic myelogenous leukemia (CML)                                         | Dr. Jianxin You   |
| LCL1      | human    | Epstein-Barr virus-transformed lymphoblastoid cell lines                   | Lab               |
| LCL2      | human    | Epstein-Barr virus-transformed lymphoblastoid cell lines                   | Lab               |
| MOLM14    | human    | Acute myeloid leukemia                                                     | DSMZ (ACC 777)    |
| MOLT-4    | human    | T lymphoblast, acute lymphoblastic leukemia                                | ATCC (CRL-1582)   |
| NB-4      | human    | Acute promyelocytic leukemia                                               | Dr. Jianxin You   |
| PBMC      | human    | Primary Peripheral Blood Mononuclear Cells, normal                         | Upenn, HIC        |
| Raji      | human    | B lymphocyte, Burkitt's lymphoma                                           | Lab               |
| RPMI-8226 | human    | Plasma cell myeloma, B lymphocyte, plasmacytoma                            | ATCC (CCL-155)    |
| SU-DHL-4  | human    | Diffuse large B-cell lymphoma germinal center B-cell type, B lymphocyte    | Dr. Ari Melnick   |
| SU-DHL-6  | human    | Diffuse large B-cell lymphoma germinal center B-cell type, B lymphocyte    | Dr. Ari Melnick   |
| SU-DHL-10 | human    | Diffuse large B-cell lymphoma, B lymphocyte, large cell lymphoma           | ATCC (CRL-2963)   |
| WL-1      | human    | Mantle cell lymphoma                                                       | Dr. Mariusz Wasik |

|                      |       |                                                                          |                           |
|----------------------|-------|--------------------------------------------------------------------------|---------------------------|
| Toledo               | human | B lymphocyte, diffuse large cell lymphoma; non-Hodgkin's B cell lymphoma | Dr. Wafik El-Deiry        |
| Pfeiffer             | human | Diffuse large cell lymphoma; non-Hodgkin's B cell lymphoma               | Dr. Wafik El-Deiry        |
| JeKo-1               | human | Mantle cell lymphoma                                                     | Dr. Wafik El-Deiry        |
| PDX-129              | human | B-cell Follicular lymphoma                                               | Dr. Wafik El-Deiry        |
| PDX-223              | human | Diffuse large B cell lymphoma                                            | Dr. Wafik El-Deiry        |
| PDX-255              | human | Burkitt's lymphoma                                                       | Dr. Wafik El-Deiry        |
| C17                  | human | EBV-containing nasopharyngeal carcinomas (NPC)                           | Dr. Paul Lieberman        |
| NPC43                | human | EBV-positive NPC cell line                                               | Dr. Paul Lieberman        |
| NPC53                | human | EBV-positive NPC cell line                                               | Dr. Paul Lieberman        |
|                      |       |                                                                          |                           |
| <b>Antibodies</b>    |       | Catalog No.                                                              | Company                   |
| anti-PI3K $\alpha$   |       | sc-293172                                                                | Santa Cruz                |
| anti-PI3K $\beta$    |       | sc-376641                                                                | Santa Cruz                |
| anti-PI3K $\gamma$   |       | sc-166365                                                                | Santa Cruz                |
| anti-PI3K $\delta$   |       | sc-55589                                                                 | Santa Cruz                |
| anti-PI3K $\epsilon$ |       | sc-100407                                                                | Santa Cruz                |
| anti-AKT1            |       | sc-5298                                                                  | Santa Cruz                |
| anti-P53             |       | sc-126                                                                   | Santa Cruz                |
| anti-GSK3            |       | sc-7291                                                                  | Santa Cruz                |
| anti-CCND1           |       | sc-8396                                                                  | Santa Cruz                |
| anti-GAPDH           |       | sc-47724                                                                 | Santa Cruz                |
| anti-mTOR            |       | #2983                                                                    | Cell Signaling Technology |

|                          |                                  |                                  |
|--------------------------|----------------------------------|----------------------------------|
| anti-Phospho-AKT(Ser473) | #9271                            | Cell Signaling Technology        |
| <b>Primers /Targets</b>  | <b>Forward Sequences (5'-3')</b> | <b>Reverse Sequences (5'-3')</b> |
| AKT1                     | TATTGTGAAGGAGGGTTG               | ATTCTTGAGGAGGAAGTAG              |
| ATF1                     | GGGACTTCAGACATTAACCAT<br>G       | CAGGAGATGTCATCACCACA             |
| ATF3                     | AAACAAGAAGAAGGAGAAGA             | TTCAGTTCAGCATTCA                 |
| ATF4                     | AGATAGGAAGCCAGACTA               | CTCATAACAGATGCCACTA              |
| PIK3C2B                  | GAAGTATGAATGCTACCT               | CAGTAACCAGAAGAAGTA               |
| PIK3CG                   | GTGATTCTGGAAGCCTAT               | CGATTACTTGGACTTGTTG              |
| PIK3R4                   | TGCTATATTGCTCCTGAA               | CTCCTCTTGTTCTCTGAT               |
| FOXO1                    | CGAGTTATGGAGGTATGAG              | GAGGAGAGTCAGAAGTCA               |
| FOXO3                    | ACCATCCAAGAGAACAAG               | TAAGTGAGTCCGAAGTGA               |
| GSK3A                    | AAGGTTCTCCAGGACAAG               | AAGTATCTCAGCCTCACAA              |
| GSK3B                    | TATGAATTCCGCCATGTCAGGG<br>CGGC   | TATGCGGCCGCGGTGGAGTTG<br>GAAG    |
| NFκB                     | TTGCTGGTCCCACATAGTTG             | ATGTATGTGAAGGCCCATCC             |
| PTEN                     | ATCTAGGGGTAGAGGCAAGG             | GTGGAGGACTGATGATGAAA             |
| BAX                      | TGCTTCAGGGTTTCAAGGA              | ACGGCGGCAATCATCCTCTG             |
| TP53                     | GCTCGACGCTAGGATCTGAC             | GCTTTCCACGACGGTGAC               |
| TP73                     | CCCCATCAGGGGAGGTG                | AGGGGACGCAGCGAAAC                |
| JUP                      | AGTGTGCTGAAGATTCTG               | TTGTTCTTGCTGTTGTTG               |
| DPAGT1                   | CAATGCCATCAATATCCTA              | AATCACCTTCCAACCTA                |
| NME2                     | GTTGGCAGGAACATCATT               | ACCAGTTCTTCAGGCTTA               |



|                               |                               |                               |
|-------------------------------|-------------------------------|-------------------------------|
| RNF8                          | GGTCTATTCCATTCATCAG           | GTCTTCTTCAGTAACTTCAT          |
| MYC                           | CATAGAATTCACCGCCATGCC<br>CTCA | CATAGCGGCCGCCGCACAAGA<br>GTTC |
| GSTK1                         | CCGCAAAGGACTATACAT            | AAGCATCACAGACAAGAA            |
| HMOX1                         | GACTGCGTTCCTGCTCAA            | CTCTGGTCCTTGGTGTCAT           |
| NFE2L2                        | GTAGATGACAATGAGGTT            | TGATTAGTAGCAATGAAGA           |
| NQO1                          | GAGTCTGTTCTGGCTTAT            | AACTGGAATATCACAAGGT           |
| SOD1                          | TTAATCCTCTATCCAGAA            | TCACAGAATCTTCAATAG            |
| PIK3CG KO                     | CACCGGAACGGAGAAGAGATT<br>CACG | AAACCGTGAATCTCTTCTCCGT<br>TCC |
| PIK3CG KO<br>verification     | CGTGTTGCACCTTGTAAGCTGG<br>G   | GAAGCTGAACTTTGCCCTTGGA<br>C   |
|                               |                               |                               |
| <b>Compounds</b>              | <b>Catalog No.</b>            | <b>Company</b>                |
| Copanlisib (BAY 80-6946)      | S2802                         | Selleckchem                   |
| Duvelisib (IPI-145, INK1197)  | S7028                         | Selleckchem                   |
| Idelalisib (CAL-101, GS-1101) | S2226                         | Selleckchem                   |
| IPI-549                       | S8330                         | Selleckchem                   |
