# Supplementary material for: Quassinoid analogs with enhanced efficacy for treatment of hematologic malignancies target the PI3Kγ isoform
Source: PubMed Central journal article supplement (PMC7253423; doi:10.1038/s42003-020-0996-z), 2020-05-27
Supplement: 42003_2020_996_MOESM6_ESM.pdf [file 42003_2020_996_MOESM6_ESM.pdf]

## **Description of Additional Supplementary Files**

**File Name: Supplementary Data 1**

**Description:** Upstream regulator analysis of RNA-Seq data in Brusatol-treated LCL1 cells by using Ingenuity Pathway Analysis (IPA) program (Excel file).

**File Name: Supplementary Data 2**

**Description:** Mass spectrometry data of three biotin-conjugated Brusatol analogs (Excel file).

**File Name: Supplementary Data 3**

**Description:** The source data in this manuscript (Excel file).
